# Supplementary material for: Ultrathin mesoporous graphitic carbon nitride nanosheets with functional cyano group decoration and nitrogen-vacancy defects for an efficient selective CO2 photoreduction
Source: Royal Society of Chemistry journal article supplement (doi:10.1039/d1nr02639a), 2021-01-01
Supplement: d1nr02639a1.pdf [file d1nr02639a1.pdf]

## Supporting Information

### **Ultrathin mesoporous graphitic carbon nitride nanosheets with functional cyano groups decoration and nitrogen vacancy defects for efficient selective CO<sub>2</sub> photoreduction**

Junyi Li <sup>a, b, ‡</sup>, Xiaohan Wang <sup>a, ‡</sup>, Liang Huang <sup>a</sup>, Liang Tian <sup>a</sup>, Menny Shalom <sup>b</sup>,  
Chunyan Xiong <sup>c</sup>, Haijun Zhang <sup>a, \*</sup>, Quanli Jia<sup>d</sup>, Shaowei Zhang <sup>e</sup>, Feng Liang <sup>a, \*</sup>

a The State Key Laboratory of Refractories and Metallurgy, Wuhan University of  
Science and Technology, Wuhan 430081, China

b Department of Chemistry and Ilse Katz Institute for Nanoscale Science and  
Technology, Ben-Gurion University of the Negev, Beer-Sheva 8410501, Israel

c School of Chemical Engineering and Pharmacy, Wuhan Institute of Technology,  
Wuhan 430074, China

d High Temperature Ceramic Institute, Zhengzhou University, Zhengzhou 450052,  
PR China

e College of Engineering, Mathematics and Physical Sciences, University of Exeter,  
Exeter Ex4 4QF, U.K.

\* Corresponding author. Assoc. Prof. Feng Liang, E-mail: [liangfengref@wust.edu.cn](mailto:liangfengref@wust.edu.cn);  
Prof. Haijun Zhang, E-mail: [zhanghaijun@wust.edu.cn](mailto:zhanghaijun@wust.edu.cn), Tel: +86-27-68862829

‡ These authors contributed equally to this work.

Table S1 Textural parameters of nitrogen sorption analysis and elemental analysis for BCN and CNNS.

| sample | $S_{\text{BET}}$<br>( $\text{m}^2/\text{g}$ ) | Pore<br>volume<br>( $\text{cm}^3/\text{g}$ ) | Pore<br>size<br>(nm) | Elemental analysis (atom%) |      |      |      |      |
|--------|-----------------------------------------------|----------------------------------------------|----------------------|----------------------------|------|------|------|------|
|        |                                               |                                              |                      | C                          | N    | H    | O    | C/N  |
| BCN    | 7.0                                           | 0.63                                         | 5.25                 | 34.1                       | 49.9 | 13.7 | 1.1  | 0.68 |
| CNNS   | 512.6                                         | 1.72                                         | 8.95                 | 23.3                       | 32.0 | 31.5 | 13.1 | 0.73 |

Table S2 Elemental compositions of BCN and CNNS based on XPS results.

|             | BCN                                                                                                              | CNNS                                                                                                  |
|-------------|------------------------------------------------------------------------------------------------------------------|-------------------------------------------------------------------------------------------------------|
| C<br>(at.%) | <b>51.5%</b><br>C-C (16.3%)<br>C-NH <sub>x</sub> (x=1, 2) (14.0%)<br>C≡N (5.4 %)<br>N=C-(N) <sub>2</sub> (64.3%) | <b>67.7%</b><br>C-C (64.5%)<br>C-NH <sub>x</sub> (5.6%)<br>C≡N (9.1%)<br>N=C-(N) <sub>2</sub> (20.8%) |
| N<br>(at.%) | <b>41.7%</b><br>C=N-C (57.7%)<br>N-(C) <sub>3</sub> (24.1%)<br>N-H (18.2%)                                       | <b>13.7%</b><br>C=N-C (55.1%)<br>C <sub>3</sub> -N (26.1%)<br>C≡N (11.6%)<br>N-H (7.2%)               |
| O<br>(at.%) | <b>6.8%</b><br>H <sub>2</sub> O (88.9%)<br>O <sub>2</sub> (11.1%)                                                | <b>18.6%</b><br>H <sub>2</sub> O (46.6%)<br>O <sub>2</sub> (53.4%)                                    |

Table S3 Comparison of photocatalytic CO<sub>2</sub> reduction performance of various materials.

| Photocatalysts                                     | Conditions                                                                                              | Rate<br>( $\mu\text{mol}\cdot\text{g}^{-1}\cdot\text{h}^{-1}$ ) | References | Year |
|----------------------------------------------------|---------------------------------------------------------------------------------------------------------|-----------------------------------------------------------------|------------|------|
| <b>CNNS</b>                                        | H <sub>2</sub> O, Xe lamp, 5 h<br>( $\lambda \geq 200 \text{ nm}/\lambda \geq 420 \text{ nm}$ )         | CH <sub>4</sub> : 50.8/23.0,<br>CO: 5.1/1.9                     | This work  |      |
| <b>BCN</b>                                         | H <sub>2</sub> O, Xe lamp, 5 h<br>( $\lambda \geq 200 \text{ nm}/\lambda \geq 420 \text{ nm}$ )         | CO: 2.6/1.1                                                     | This work  |      |
| <b>N-CQDs-TiO<sub>2</sub></b>                      | H <sub>2</sub> O, Xe lamp, 6 h                                                                          | CH <sub>4</sub> : 3.98,<br>CO: 6.13                             | [S1]       | 2018 |
| <b>g-C<sub>3</sub>N<sub>4</sub></b>                | H <sub>2</sub> O, Xe lamp, 5 h<br>( $\lambda > 200 \text{ nm}$ )                                        | CH <sub>4</sub> : 0.24,<br>CO: 2.1                              | [S2]       | 2016 |
| <b>P-doped g-C<sub>3</sub>N<sub>4</sub></b>        | H <sub>2</sub> O, Vis ( $\lambda \geq 420 \text{ nm}$ ),<br>4 h                                         | CO: 2.37,<br>CH <sub>4</sub> : 1.81                             | [S3]       | 2018 |
| <b>Co<sub>3</sub>O<sub>4</sub>/CNS</b>             | H <sub>2</sub> O, Xe lamp, 4 h                                                                          | CO: 13.31,<br>CH <sub>4</sub> : 3.17                            | [S4]       | 2020 |
| <b>WO<sub>3</sub>/g-C<sub>3</sub>N<sub>4</sub></b> | H <sub>2</sub> O, UV ( $254 \leq \lambda < 420 \text{ nm}$ )/Vis ( $\lambda \geq 420 \text{ nm}$ ), 4 h | CO: 14.60/1.37,<br>CH <sub>4</sub> : 10.37/0.75                 | [S5]       | 2020 |
| <b>Bi<sub>4</sub>O<sub>5</sub>Br<sub>2</sub></b>   | H <sub>2</sub> O, Xe lamp, 2 h                                                                          | CO: 3.16,<br>CH <sub>4</sub> : 0.5                              | [S6]       | 2019 |
| <b>Ru/g-C<sub>3</sub>N<sub>4</sub></b>             | H <sub>2</sub> O, Xe lamp, 4 h<br>( $420 \leq \lambda < 780 \text{ nm}$ )                               | CO: (4.78),<br>CH <sub>4</sub> : (0.78)                         | [S7]       | 2018 |

|                                                     |                                                |                                                    |       |      |
|-----------------------------------------------------|------------------------------------------------|----------------------------------------------------|-------|------|
| <b>SnS<sub>2</sub>/g-C<sub>3</sub>N<sub>4</sub></b> | H <sub>2</sub> O, Xe lamp, 4 h<br>(λ > 420 nm) | CH <sub>4</sub> : 0.64,<br>CH <sub>3</sub> OH: 2.3 | [S8]  | 2017 |
| <b>PdO/TiO<sub>2</sub></b>                          | H <sub>2</sub> O, UV light, 2 h                | CO: 0.12,<br>CH <sub>4</sub> : 13.99               | [S9]  | 2019 |
| <b>O-doped g-C<sub>3</sub>N<sub>4</sub></b>         | H <sub>2</sub> O, Xe lamp<br>(λ > 420 nm)      | CH <sub>3</sub> OH: 0.88                           | [S10] | 2017 |
| <b>MnO<sub>2</sub>/g-C<sub>3</sub>N<sub>4</sub></b> | H <sub>2</sub> O, Xe lamp, 6 h                 | CO: 3.4                                            | [S11] | 2017 |
| <b>NiO/g-C<sub>3</sub>N<sub>4</sub></b>             | H <sub>2</sub> O, Xe lamp, 8 h                 | CO: 4.17                                           | [S12] | 2018 |
| <b>Pt@Bi-TiO<sub>2</sub></b>                        | H <sub>2</sub> O, Hg lamp, 10 h                | CH <sub>4</sub> : 2.06                             | [S13] | 2020 |
| <b>Au/C<sub>3</sub>N<sub>4</sub></b>                | H <sub>2</sub> O, Xe lamp, 2 h                 | CO : 6.59,<br>CH <sub>4</sub> : 1.55               | [S14] | 2018 |
| <b>Bi<sub>2</sub>MoO<sub>6</sub></b>                | H <sub>2</sub> O, Xe lamp, 6 h                 | CO : 3.62                                          | [S15] | 2019 |
| <b>Ni-Bi co-doped<br/>TiO<sub>2</sub></b>           | H <sub>2</sub> O, 250W Hg lamp,<br>10 h        | CH <sub>4</sub> : 2.11                             | [S16] | 2020 |

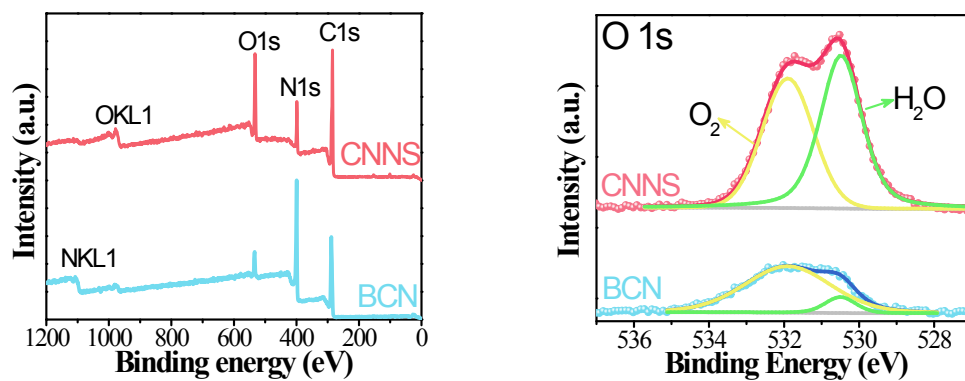

Figure S1 XPS wide spectra and high resolution O 1s XPS spectra of BCN and CNNS.

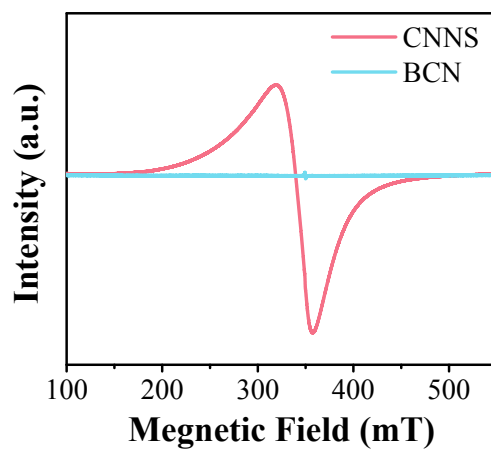

Figure S2 EPR spectra of BCN and CNNS.

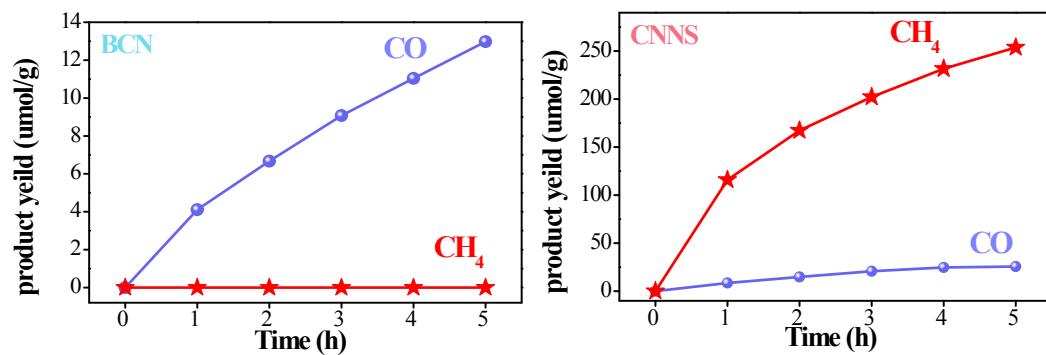

Figure S3. Time-production plots of the CO and CH<sub>4</sub> generated from the photocatalytic CO<sub>2</sub> reduction over the BCN (left) and CNNS (right). (photocatalysis condition: 0.05 g photocatalysts, 5 mL H<sub>2</sub>O, Light  $\lambda \geq 200$  nm, 20°C)



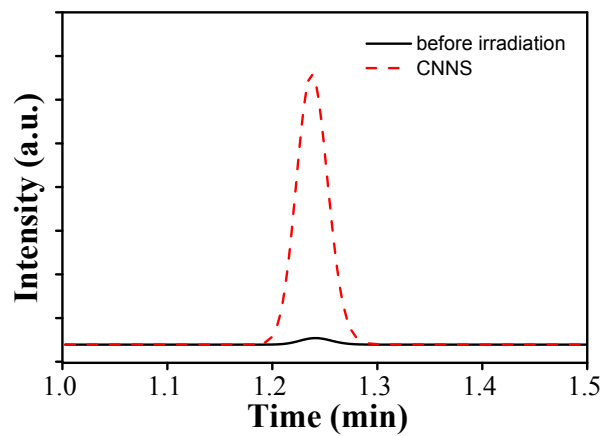

Figure S4. The GC spectra of resulting O<sub>2</sub> after photocatalytic CO<sub>2</sub>-reduction reactions (visible-light-driven,  $\lambda \geq 420$  nm) over CNNS.

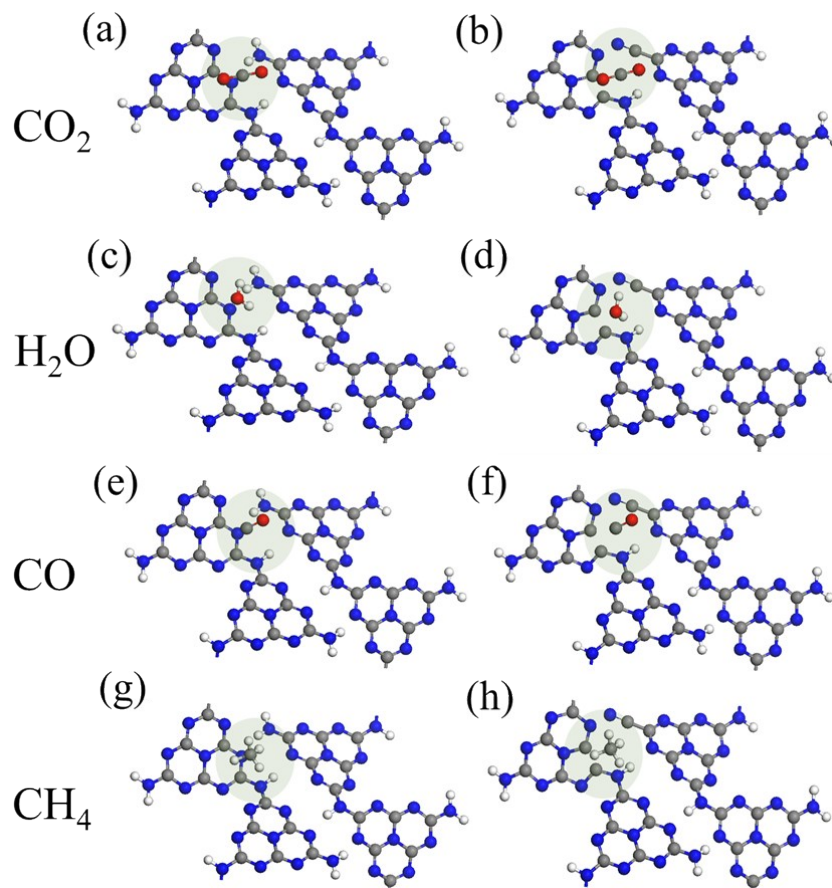

Figure S5 CO<sub>2</sub>, H<sub>2</sub>O, CO, CH<sub>4</sub> adsorption geometry on BCN (a, c, e, and g) and CNNS with nitrogen vacancy and cyano group (b, d, f, and h).

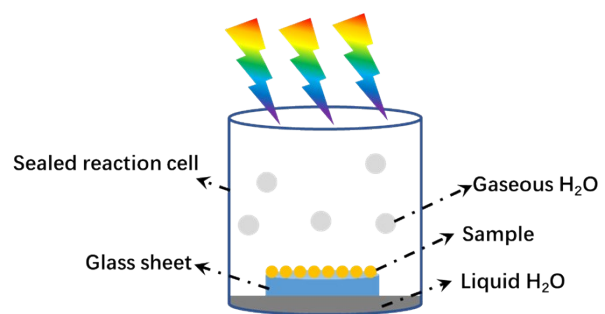

Figure S6 Illustration of the experimental setup for photocatalytic CO<sub>2</sub> reduction.

## References

[S1] Li M, Wang M, Zhu L, et al. Facile microwave assisted synthesis of N-rich carbon quantum dots/dual-phase TiO<sub>2</sub> heterostructured nanocomposites with high activity in CO<sub>2</sub> photoreduction[J]. Applied Catalysis B: Environmental, 2018, 231: 269-276.

[S2] Wang H, Sun Z, Li Q, et al. Surprisingly advanced CO<sub>2</sub> photocatalytic conversion over thiourea derived g-C<sub>3</sub>N<sub>4</sub> with water vapor while introducing 200–420 nm UV light[J]. Journal of CO<sub>2</sub> Utilization, 2016, 14: 143-151.

[S3] Li M, Zhang L, Fan X, et al. Core-shell LaPO<sub>4</sub>/g-C<sub>3</sub>N<sub>4</sub> nanowires for highly active and selective CO<sub>2</sub> reduction[J]. Applied Catalysis B: Environmental, 2017, 201: 629-635.

[S4] Hangfan Ma X L, Shiyang Fan , Zhifan Yin , Guoqiang Gan , Meichun Qin , Penglei Wang , Yaxuan Li , Lianzhou Wang In Situ Formation of Interfacial Defects between Co-Based Spinel Carbon Nitride Hybrids for Efficient CO<sub>2</sub> Photoreduction[J]. ACS Applied Energy Materials, 2020, 3(5): 5083–5094.

[S5] Li X, Song X, Ma C, et al. Direct Z-Scheme WO<sub>3</sub>/Graphitic Carbon Nitride Nanocomposites for the Photoreduction of CO<sub>2</sub>[J]. ACS Applied Nano Materials, 2020, 3(2): 1298-1306.

[S6] Jin X, Lv C, Zhou X, et al. A bismuth rich hollow Bi<sub>4</sub>O<sub>5</sub>Br<sub>2</sub> photocatalyst enables dramatic CO<sub>2</sub> reduction activity[J]. Nano Energy, 2019, 64: 103955.

[S7] Ye F, Wang F, Meng C, et al. Crystalline phase engineering on cocatalysts: A promising approach to enhancement on photocatalytic conversion of carbon dioxide

- to fuels[J]. Applied Catalysis B: Environmental, 2018, 230: 145-153.
- [S8] Di T, Zhu B, Cheng B, et al. A direct Z-scheme g-C<sub>3</sub>N<sub>4</sub>/SnS<sub>2</sub> photocatalyst with superior visible-light CO<sub>2</sub> reduction performance[J]. Journal of Catalysis, 2017, 352: 532-541.
- [S9] Mekasuwandumrong O, Jantarasorn N, Panpranot J, et al. Synthesis of Cu/TiO<sub>2</sub> catalysts by reactive magnetron sputtering deposition and its application for photocatalytic reduction of CO<sub>2</sub> and H<sub>2</sub>O to CH<sub>4</sub>[J]. Ceramics International, 2019, 45(17): 22961-22971.
- [S10] Fu J, Zhu B, Jiang C, et al. Hierarchical Porous O-Doped g-C<sub>3</sub>N<sub>4</sub> with Enhanced Photocatalytic CO<sub>2</sub> Reduction Activity[J]. Small, 2017, 13(15).
- [S11] Wang M, Shen M, Zhang L, et al. 2D-2D MnO<sub>2</sub>/g-C<sub>3</sub>N<sub>4</sub> heterojunction photocatalyst: In-situ synthesis and enhanced CO<sub>2</sub> reduction activity[J]. Carbon, 2017, 120: 23-31.
- [S12] Tang J-y, Guo R-t, Zhou W-g, et al. Ball-flower like NiO/g-C<sub>3</sub>N<sub>4</sub> heterojunction for efficient visible light photocatalytic CO<sub>2</sub> reduction[J]. Applied Catalysis B: Environmental, 2018, 237: 802-810.
- [S13] Mohsen Moradi F K, Afsanehsadat Larimi Pt nanoparticles decorated Bi-doped TiO<sub>2</sub> as an efficient photocatalyst for CO<sub>2</sub> photo-reduction into CH<sub>4</sub>[J]. Solar Energy, 2020, 211: 100-110.
- [S14] Li H, Gao Y, Xiong Z, et al. Enhanced selective photocatalytic reduction of CO<sub>2</sub> to CH<sub>4</sub> over plasmonic Au modified g-C<sub>3</sub>N<sub>4</sub> photocatalyst under UV-vis light irradiation[J]. Applied Surface Science, 2018, 439: 552-559.

[S15] Jun Di X Z, Cheng Lian, Mengxia Ji, Jiexiang Xia, Jun Xiong, Wu Zhou, Xingzhong Cao, Yuanbin She, Honglai Liu, Kian Ping Loh, Stephen J. Pennycook, Huaming Li, Zheng Liu. Atomically-thin  $\text{Bi}_2\text{MoO}_6$  nanosheets with vacancy pairs for improved photocatalytic  $\text{CO}_2$  reduction[J]. *Nano Energy*, 2019, 61: 54-59.

[S16] Nematollahi R, Ghotbi C, Khorasheh F, et al. Ni-Bi co-doped  $\text{TiO}_2$  as highly visible light response nano-photocatalyst for  $\text{CO}_2$  photo-reduction in a batch photo-reactor[J]. *Journal of  $\text{CO}_2$  Utilization*, 2020, 41.
